# Supplementary material
Source: Springer Nature journal article supplement (https://www.springermedizin.de/resource/supplementary/12874_2012_842_MOESM7_ESM.pdf/9432708)

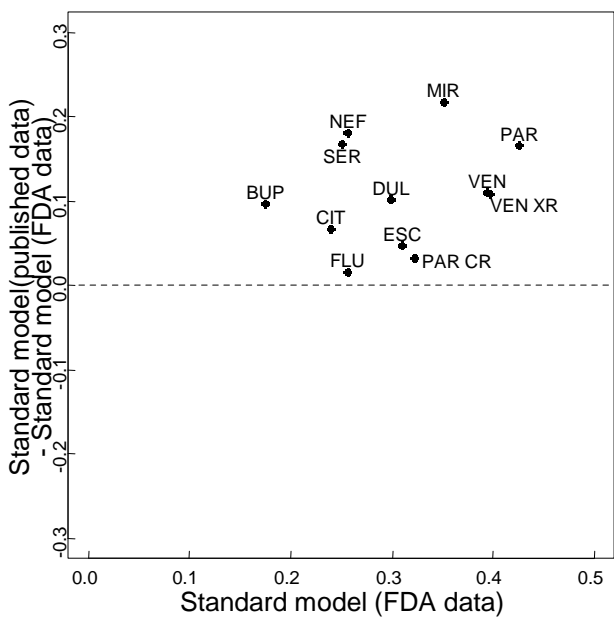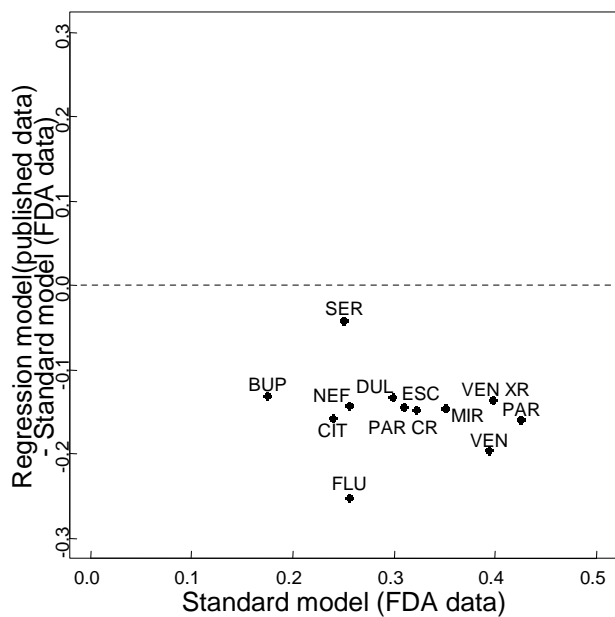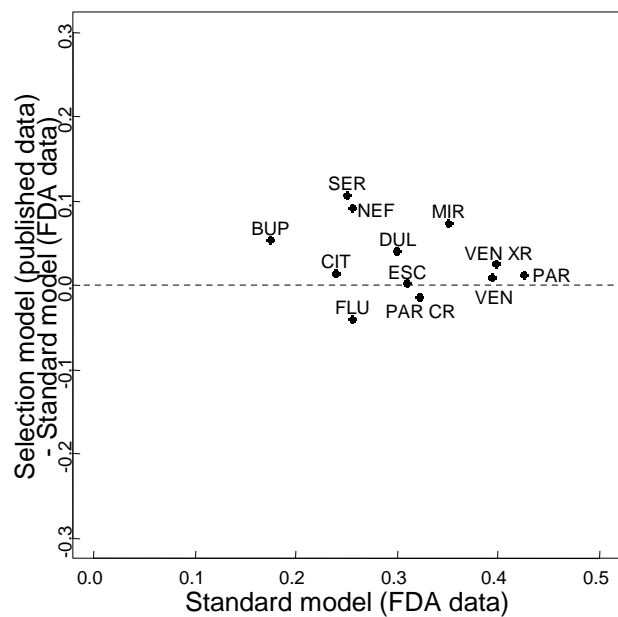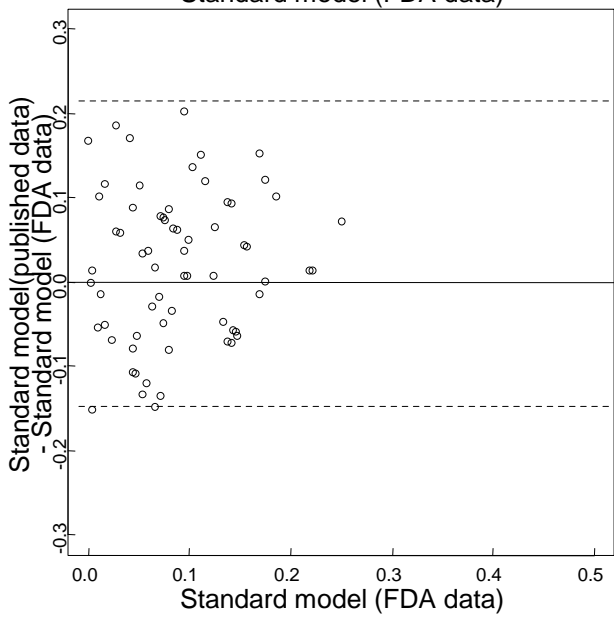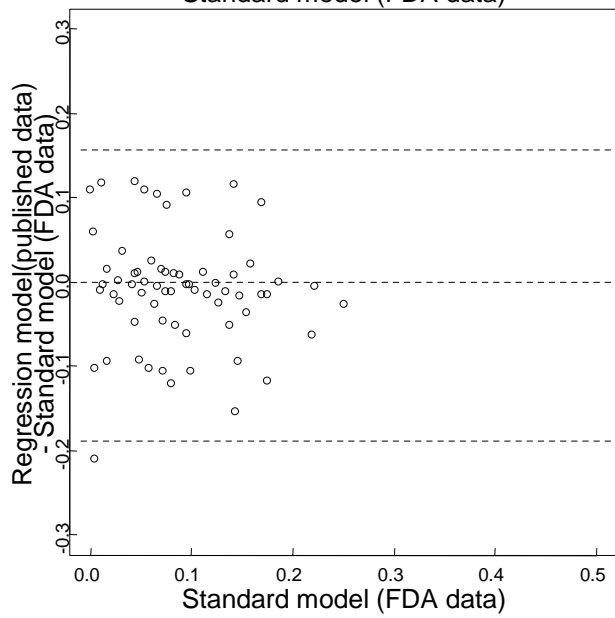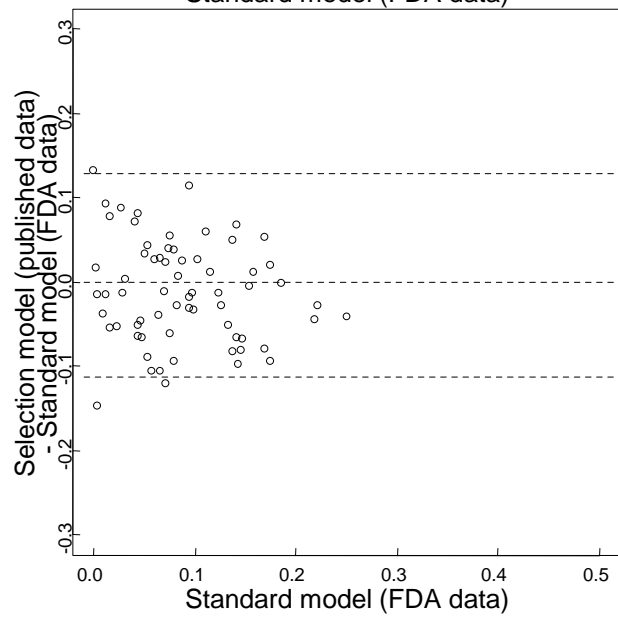

Supplement: MOESM7 [file 9432708]
